# Supplementary material
Source: publisher figshare collection journal article supplement (https://tandf.figshare.com/ndownloader/files/17829122)
Supplement: Supplementary file 1 [file 17829122]

Kinetic [analysis](https://www.sciencedirect.com/science/article/pii/S0960148118307377) of new multi-component reaction for the formation of Z -N-(3-(naphthalene-2-yl)-4-oxothiazolidine-2-ylidene) benzamide

Mahdieh Darijani, Sayyed Mostafa Habibi-Khorassani*, Mehdi Shahraki,[Reza Heydari](https://www.researchgate.net/scientific-contributions/13498537_Reza_Heydari?_sg=0phuQhF6ZBfZ43sVcyLeSr0Ho3-3vzeA2qyFHxyppsAsweRfgevm0b3m4P2yG1uOzE7taQo.cuwOU5hUISv1osKnQwIerw9jkvk7IeUFV9bl1ojR9mpZLr0cErswL0feMLVBt-P5y-eLTsbAL-a6vrrcu1Xhdw), YaserShahbakhsh and [Mahshid Hossaini](https://www.researchgate.net/profile/Mahshid_Hossaini?_sg=0phuQhF6ZBfZ43sVcyLeSr0Ho3-3vzeA2qyFHxyppsAsweRfgevm0b3m4P2yG1uOzE7taQo.cuwOU5hUISv1osKnQwIerw9jkvk7IeUFV9bl1ojR9mpZLr0cErswL0feMLVBt-P5y-eLTsbAL-a6vrrcu1Xhdw)

Department of Chemistry, Faculty of Science, University of Sistan and Baluchestan, P O Box 98135-674, Zahedan, Iran

E-mail: smhabibi@chem.usb.ac.ir

**Supplemental Materials**

If the fourth step of the reaction be RDS, then the third step will be an equilibrium step. **Fig S 1** shows the simple form of the reaction mechanism in this condition.

On the basis of above statements, rate law can be derived as follow:

(1)

(2)

(3)

(4)

(6)

(7)

if

(8)

(9)

Like previous section, if third step be the RDS, so step2 should be assumed as an equilibrium step. **Fig S 2** shows the simple form of the reaction mechanism in this condition.

On the basis of above statements, rate law can be derived as follow:

(10)

(11)

(12)

(13)

(14)

(15)

(16)

if

(17)

Continuing the RDS assumption for the second step of the reaction, first step will be in equilibrium state. **Fig S 3** shows the simple form of the reaction mechanism in this condition.

On the basis of above statements, rate law can be derived as follow:

(18)

(19)

(20)

(21)

if

(22)

(23)

(24)

(25)

**Figure S 1:** The simplified Scheme for the proposed reaction mechanism with step4 RDS

**Figure S 2:** The simplified Scheme for the proposed reaction mechanism with step3 RDS

**Figure S 3:** The simplified Scheme for the proposed reaction mechanism with step2 RDS
